# Supplementary material
Source: Research Square preprint supplement (doi:10.21203/rs.3.rs-9280837/v1)
Supplement: Supplementary file 1 [file 69bc349db8867514c2dc08f8.xlsx]

## Sheet: PR_Overview
PR	Reference year for the data	Operator name	Site/Mine Name	Country	Process description	Primary commodity	Co/By-product	Deposit	Site type
PR1	2024	Anglo American	Barro Alto	Brazil	Open-pit laterite mining. Ore is used to feed the Barro Alto pyrometallurgical plant and, historically, part of the ore has also been blended for Codemin. Barro Alto processes laterite ore via pyrometallurgy (rotary kilns/electric furnaces) to produce ferronickel.	Ferronickel	Manganese	Laterite	Mine + ferronickel plant
PR2	2024	Anglo American	Codemin	Brazil	Open-pit laterite mining at Niquelândia/Codemin. Ore is processed in a pyrometallurgical ferronickel plant (smelter) to produce ferronickel; historically, Barro Alto ore has been trucked to Codemin for processing/blending.	Ferronickel	Manganese	Laterite	Mine + ferronickel smelter
PR3	2019	BHP	Nickel West (Kalgoorlie)	Australia	Kalgoorlie is part of the Nickel West processing chain. Nickel sulphide concentrates from Mt Keith, Leinster and Kambalda are brought together at the Kalgoorlie smelter, where a flash furnace is used to produce nickel matte (~66% purity). Matte is then further refined downstream (e.g. Kwinana) or sold/exported.	Nickel matte	Not clearly reported	N/A- processing fed by nickel sulphide concentrates	Processing site (smelter)
PR4	2023	Brazilian Nickel	Piauí	Brazil	Laterite nickel project using heap leaching / hydrometallurgical processing to produce MHP with high nickel content and low impurities. The project is positioned as an integrated mine-to-product operation rather than a conventional concentrator-smelter route.	Mixed hydroxide precipitate (MHP)	Cobalt (contained in MHP)	Laterite	Mine + hydrometallurgical processing
PR5	2023	First Quantum	Ravensthorpe	Australia	Open-pit mining of laterite ore from several orebodies, beneficiation/ore preparation, and hydrometallurgical processing. The processing route includes pressure acid leaching (PAL), atmospheric leaching, counter-current decantation and precipitation to produce MHP.	Mixed hydroxide precipitate (MHP)	Cobalt (contained in MHP)	Laterite	Mine + hydrometallurgical processing
PR6	2022	IGO Limited	Nova Operation	Australia	Underground nickel-copper-cobalt mine with on-site processing to produce nickel and copper concentrates for shipment/sale. No downstream refining is reported on site.	Nickel concentrate	Copper, Cobalt, Gold	Sulphide	Underground mine + concentrator
PR7	2023	Nickel Asia Corporation	RTN (Rio Tuba Nickel Mining Corporation)	Philippines	Low-cost surface mining of laterite ore (saprolite and limonite). Saprolite and limonite are exported or sold, while limonite is also supplied to the adjacent Coral Bay HPAL plant for hydrometallurgical nickel/cobalt processing. No nickel refining is reported as part of RTN itself.	Nickel ore	Limestone	Laterite	Mine
PR8	2023	Nickel Asia Corporation	TMC (Taganito Mining Corporation	Philippines	Surface mining of laterite ore (saprolite and limonite). Ore is exported/sold as direct shipping ore, while limonite is also supplied to the adjacent Taganito HPAL plant for downstream hydrometallurgical processing.	Nickel ore	Not clearly reported	Laterite	Mine
PR9	2023	Nickel Asia Corporation	HMC (Hinatuan Mining Corporation)	Philippines	Surface mining of laterite ore (saprolite and limonite) for export/sale as direct shipping ore. No on-site refining is reported.	Nickel ore	No major co-products reported	Laterite	Mine
PR10	2023	Nickel Asia Corporation	CMC (Cagdianao Mining Corporation)	Philippines	Surface mining of laterite ore (saprolite and limonite). Ore is mainly exported/sold as direct shipping ore; in some periods limonite has also been delivered to domestic HPAL processing.	Nickel ore	No major co-products reported	Laterite	Mine
PR11	2023	Nickel Asia Corporation	DMC (Dinapigue Mining Corporation)	Philippines	Surface mining of laterite ore (saprolite and limonite) for export/sale as direct shipping ore. No on-site refining is reported.	Nickel ore	No major co-products reported	Laterite	Mine
PR12	2023	PT Trimegah Bangun Persada Tbk	Trimegah Bangun Persada (TBP Mining)	Indonesia	Surface mining of laterite ore on Obi Island. TBP is one of the two operating mines supplying saprolite and limonite ore to the group’s downstream RKEF smelters and HPAL refineries.	Nickel ore	No major co-products reported	Laterite	Mine
			Gane Permai Sentosa (GPS Mining),		Surface mining of laterite ore on Obi Island. GPS is the second operating mine supplying ore into Harita Nickel’s downstream RKEF and HPAL operations.
PR13	2023	PT Trimegah Bangun Persada Tbk	Megah Surya Pertiwi (PT MSP),	Indonesia	Pyrometallurgical RKEF smelter using saprolite ore mined by TBP and GPS. MSP has four production lines and produces ferronickel for stainless steel applications.	Ferronickel	Not clearly reported	N/A – processing site fed by saprolite laterite ore	Processing site (RKEF smelter)
PR14	2023	PT Trimegah Bangun Persada Tbk	Halmahera Persada Lygend (PT HPL),	Indonesia	Hydrometallurgical HPAL refinery fed by limonite ore from Harita Nickel’s mines. HPL operates three production lines and produces MHP; it also started producing nickel sulfate and cobalt sulfate.	Mixed hydroxide precipitate (MHP)	Cobalt (contained in MHP)	N/A – processing site fed by limonite laterite ore	Processing site (HPAL refinery)
PR15	2023	PT Trimegah Bangun Persada Tbk	Halmahera Jaya Ferronickel (PT HJF)	Indonesia	Pyrometallurgical RKEF ferronickel smelter. HJF ramped up to eight production lines and produces ferronickel from laterite saprolite ore sourced from the group’s mines.	Ferronickel	Not clearly reported	N/A – processing site fed by saprolite laterite ore	Processing site (RKEF smelter)
PR16	2023	TVI Resource Development (Phils.)	Agata mining ventures inc. (AMVI)	Philippines	Open-pit / surface mining of nickel laterite ore followed by trucking and loading at the Agata Port for shipment as direct shipping ore. No on-site refining is reported.	Nickel ore	Limestone, Iron	Laterite	Mine

## Sheet: PR_References
PR	Operator name	Reference
PR1	Anglo American	Anglo American plc. Integrated Annual Report 2024; Report; Anglo American plc, 2025. https://www.angloamerican.com/~/media/Files/A/Anglo-American-Group-v9/PLC/investors/annual-reporting/2024/aa-annual-report-full-2024.pdf.
PR2	Anglo American	Anglo American plc. Integrated Annual Report 2024; Report; Anglo American plc, 2025. https://www.angloamerican.com/~/media/Files/A/Anglo-American-Group-v9/PLC/investors/annual-reporting/2024/aa-annual-report-full-2024.pdf.
PR3	BHP	BHP. Sustainability Report 2019; Report; BHP, 2019. https://www.bhp.com/-/media/documents/investors/annual-reports/2019/bhpsustainabilityreport2019.pdf.
PR4	Brazilian Nickel	Brazilian Nickel. Sustainability Report 2023; Report; Brazilian Nickel, 2025. https://www.braziliannickel.com/wp-content/uploads/2025/01/BRN_2023-Sustainability-Report_20250110.pdf.
PR5	First Quantum	First Quantum Minerals Ltd. Environmental, Social and Governance Report 2023; Report; First Quantum Minerals Ltd., 2024. https://www.first-quantum.com/wp-content/uploads/2024/05/FINAL-2023-ESG-Report.pdf.
PR6	IGO Limited	IGO Limited (2022) Sustainability Report 2022. Report. IGO Limited. Available at: https://www.igo.com.au/site/pdf/bb31abd5-2374-460e-ada3-96f2cad3abaa/2022-Sustainability-Report.pdf.
PR6	IGO Limited	IGO Limited (2022a) Annual Report 2022. Perth, Western Australia: IGO Limited. Available at: https://www.igo.com.au/site/pdf/200c4e90-bf4e-4231-961a-dacc64e9a556/2022-Annual-Report-to-Shareholders.pdf.
PR7	Nickel Asia Corporation	Nickel Asia Corporation. Integrated Report 2023; Report; Nickel Asia Corporation, 2024. https://nickelasia.com/assets/documents/NAC-Integrated-Report-2023.pdf.
PR8	Nickel Asia Corporation	Nickel Asia Corporation. Integrated Report 2023; Report; Nickel Asia Corporation, 2024. https://nickelasia.com/assets/documents/NAC-Integrated-Report-2023.pdf.
PR9	Nickel Asia Corporation	Nickel Asia Corporation. Integrated Report 2023; Report; Nickel Asia Corporation, 2024. https://nickelasia.com/assets/documents/NAC-Integrated-Report-2023.pdf.
PR11	Nickel Asia Corporation	Nickel Asia Corporation. Integrated Report 2023; Report; Nickel Asia Corporation, 2024. https://nickelasia.com/assets/documents/NAC-Integrated-Report-2023.pdf.
PR12	Nickel Asia Corporation	Nickel Asia Corporation. Integrated Report 2023; Report; Nickel Asia Corporation, 2024. https://nickelasia.com/assets/documents/NAC-Integrated-Report-2023.pdf.
PR13	PT Trimegah Bangun Persada Tbk	PT Trimegah Bangun Persada Tbk. Laporan Keberlanjutan Harita Nickel 2023; Report; PT Trimegah Bangun Persada Tbk, 2024. https://tbpnickel.com/files/sustainability_assets/Laporan%20Keberlanjutan%20Harita%20Nickel%202023.pdf.
PR13	PT Trimegah Bangun Persada Tbk	Hidayat, T. (2024) “Recent Growth of Nickel Laterite Processing in Indonesia.” ALTA Nickel-Cobalt Conference. Available at: https://d3e2i5nuh73s15.cloudfront.net/wp-content/uploads/2024/06/01.02-RECENT-GROWTH-OF-NICKEL-LATERITE-PROCESSING-IN-INDONESIA.pdf.
PR13	PT Trimegah Bangun Persada Tbk	PT Trimegah Bangun Persada Tbk (Harita Nickel) (2024) FY23 Analyst & Investor Briefing. PT Trimegah Bangun Persada Tbk. Available at: https://tbpnickel.com/files/pdf_assets/FY23%20Analyst%20%20Investor%20Briefing_Final.pdf.
PR14	PT Trimegah Bangun Persada Tbk	PT Trimegah Bangun Persada Tbk. Laporan Keberlanjutan Harita Nickel 2023; Report; PT Trimegah Bangun Persada Tbk, 2024. https://tbpnickel.com/files/sustainability_assets/Laporan%20Keberlanjutan%20Harita%20Nickel%202023.pdf.
PR14	PT Trimegah Bangun Persada Tbk	PT Trimegah Bangun Persada Tbk (Harita Nickel) (2024) FY23 Analyst & Investor Briefing. PT Trimegah Bangun Persada Tbk. Available at: https://tbpnickel.com/files/pdf_assets/FY23%20Analyst%20%20Investor%20Briefing_Final.pdf.
PR15	PT Trimegah Bangun Persada Tbk	PT Trimegah Bangun Persada Tbk. Laporan Keberlanjutan Harita Nickel 2023; Report; PT Trimegah Bangun Persada Tbk, 2024. https://tbpnickel.com/files/sustainability_assets/Laporan%20Keberlanjutan%20Harita%20Nickel%202023.pdf.
PR16	TVI Resource Development (Phils.)	TVI Resource Development (Phils.) Incorporated. Transformative Mining Towards a Sustainable Future; ESG Report; TVI Resource Development (Phils.) Incorporated, 2024. https://tvird.com.ph/wp-content/uploads/2024/08/TVIRD-2023-ESG-Report.pdf.
PR16	TVI Resource Development (Phils.)	Mines and Geosciences Bureau Regional Office No. XIII (2023) AMVI Quick Facts 2023. Mines and Geosciences Bureau Regional Office No. XIII. Available at: https://www.mgbr13.ph/wp-content/uploads/MGB-ROXIII-2023-AMVI-Quick-Facts.pdf.

## Sheet: PR1_Barro Alto_BR_Anglo America
Reference	Flow (As reported by the authors)	Type of flow	Classification of flows	Unit (As reported by the authors)	Total annual amount (Raw data as reported)	Inputs and Outputs Intensity (/tonne Ni in FeNi)
Anglo American plc. Integrated Annual Report 2024; Report; Anglo American plc, 2025. https://www.angloamerican.com/~/media/Files/A/Anglo-American-Group-v9/PLC/investors/annual-reporting/2024/aa-annual-report-full-2024.pdf.	Energy	Input flows (I)	I from tech - electricity/heat	GJ	1.71338e+07	530.457
Anglo American plc. Integrated Annual Report 2024; Report; Anglo American plc, 2025. https://www.angloamerican.com/~/media/Files/A/Anglo-American-Group-v9/PLC/investors/annual-reporting/2024/aa-annual-report-full-2024.pdf.	Production - Barro Alto - Nickel	Product flows (P)	Reference product (of unit operation)	tonnes	32300	1
Note: "Undefined system model": in this table, all values are reported without any allocation

## Sheet: PR2_Codemin_BR_Anglo American
Reference	Flow (As reported by the authors)	Type of flow	Classification of flows	Unit (As reported by the authors)	Total annual amount (Raw data as reported)	Inputs and Outputs Intensity (/tonne Ni in FeNi)
Anglo American plc. Integrated Annual Report 2024; Report; Anglo American plc, 2025. https://www.angloamerican.com/~/media/Files/A/Anglo-American-Group-v9/PLC/investors/annual-reporting/2024/aa-annual-report-full-2024.pdf.	Energy	Input flows (I)	I from tech - electricity/heat	GJ	3.76624e+06	530.457
Anglo American plc. Integrated Annual Report 2024; Report; Anglo American plc, 2025. https://www.angloamerican.com/~/media/Files/A/Anglo-American-Group-v9/PLC/investors/annual-reporting/2024/aa-annual-report-full-2024.pdf.	Production - Codemin - Nickel	Product flows (P)	Reference product (of unit operation)	tonnes	7100	1
Note: "Undefined system model": in this table, all values are reported without any allocation

## Sheet: PR3_Nickel West_AU_BHP
Reference	Flow (As reported by the authors)	Type of flow	Classification of flows	Unit (As reported by the authors)	Total annual amount (Raw data as reported)	Inputs and Outputs Intensity (/tonne Ni in matte)
BHP. Sustainability Report 2019; Report; BHP, 2019. https://www.bhp.com/-/media/documents/investors/annual-reports/2019/bhpsustainabilityreport2019.pdf.	Scope 1 GHG emissions	Output flows (O)	O to env - air	kilotonnes CO2-e	460	0.00528736
BHP. Annual Report 2019; Annual Report; BHP, 2019. https://www.bhp.com/investor-centre/-/media/documents/investors/annual-reports/2019/bhpannualreport2019	Nickel production	Product flows (P)	Reference product (of unit operation)	tonnes	87000	1
Note: "Undefined system model": in this table, all values are reported without any allocation

## Sheet: PR4_Piauí_BR_Brazilian Nickel
Reference	Flow (As reported by the authors)	Type of flow	Classification of flows	Unit (As reported by the authors)	Total annual amount (Raw data as reported)	Inputs and Outputs Intensity (/tonne Ni in MHP)
Brazilian Nickel. Sustainability Report 2023; Report; Brazilian Nickel, 2025. https://www.braziliannickel.com/wp-content/uploads/2025/01/BRN_2023-Sustainability-Report_20250110.pdf.	Diesel energy consumption	Input flows (I)	I from tech - electricity/heat	GJ	14236	0.766365
Brazilian Nickel. Sustainability Report 2023; Report; Brazilian Nickel, 2025. https://www.braziliannickel.com/wp-content/uploads/2025/01/BRN_2023-Sustainability-Report_20250110.pdf.	Electricity energy consumption	Input flows (I)	I from tech - electricity/heat	GJ	21547	1.15994
Brazilian Nickel. Sustainability Report 2023; Report; Brazilian Nickel, 2025. https://www.braziliannickel.com/wp-content/uploads/2025/01/BRN_2023-Sustainability-Report_20250110.pdf.	GHG Scope 1 emissions	Output flows (O)	O to env - air	metric tonnes of CO₂e	1639	0.0882321
Brazilian Nickel. Sustainability Report 2023; Report; Brazilian Nickel, 2025. https://www.braziliannickel.com/wp-content/uploads/2025/01/BRN_2023-Sustainability-Report_20250110.pdf.	Non-hazardous Waste (Class II) - Non-inert (Class II A) generated	Output flows (O)	O to tech - waste	metric tonnes	12	0.000645995
Brazilian Nickel. Sustainability Report 2023; Report; Brazilian Nickel, 2025. https://www.braziliannickel.com/wp-content/uploads/2025/01/BRN_2023-Sustainability-Report_20250110.pdf.	Non-hazardous Waste (Class II) - Inert (Class II B) generated	Output flows (O)	O to tech - waste	metric tonnes	146	0.0078596
Brazilian Nickel. Sustainability Report 2023; Report; Brazilian Nickel, 2025. https://www.braziliannickel.com/wp-content/uploads/2025/01/BRN_2023-Sustainability-Report_20250110.pdf.	Non-hazardous Waste (Class II) not destined for final disposal (Recycling outside the organization)	Output flows (O)	O to tech - waste	metric tonnes	2.43	0.000130814
Brazilian Nickel. Sustainability Report 2023; Report; Brazilian Nickel, 2025. https://www.braziliannickel.com/wp-content/uploads/2025/01/BRN_2023-Sustainability-Report_20250110.pdf.	Hazardous Waste (Class I) - Other disposal operations (landfill) - Outside the organization	Output flows (O)	O to tech - waste	metric tonnes	34.2	0.00184109
Brazilian Nickel. Sustainability Report 2023; Report; Brazilian Nickel, 2025. https://www.braziliannickel.com/wp-content/uploads/2025/01/BRN_2023-Sustainability-Report_20250110.pdf.	Non-hazardous Waste (Class II) - Class II A and II B landfill - Outside the organization	Output flows (O)	O to tech - waste	metric tonnes	28.85	0.00155308
Brazilian Nickel. Sustainability Report 2023; Report; Brazilian Nickel, 2025. https://www.braziliannickel.com/wp-content/uploads/2025/01/BRN_2023-Sustainability-Report_20250110.pdf.	Non-hazardous Waste (Class II) - Reservation/Recycling landfill - Outside the organization	Output flows (O)	O to tech - waste	metric tonnes	111.55	0.00600506
Brazilian Nickel. Sustainability Report 2023; Report; Brazilian Nickel, 2025. https://www.braziliannickel.com/wp-content/uploads/2025/01/BRN_2023-Sustainability-Report_20250110.pdf.	Tailings Deposited - Iron Filter Cake (IFC)	Output flows (O)	O to tech - waste	wet metric tonnes	8212.2	0.442087
Brazilian Nickel. Sustainability Report 2023; Report; Brazilian Nickel, 2025. https://www.braziliannickel.com/wp-content/uploads/2025/01/BRN_2023-Sustainability-Report_20250110.pdf.	Tailings Deposited - Bleed Filter Cake (BFC)	Output flows (O)	O to tech - waste	wet metric tonnes	3793.5	0.204215
Brazilian Nickel. Sustainability Report 2023; Report; Brazilian Nickel, 2025. https://www.braziliannickel.com/wp-content/uploads/2025/01/BRN_2023-Sustainability-Report_20250110.pdf.	Nickel output contained in MHP	Product flows (P)	Reference product (of unit operation)	tonnes per year	18576	1
Brazilian Nickel. Sustainability Report 2023; Report; Brazilian Nickel, 2025. https://www.braziliannickel.com/wp-content/uploads/2025/01/BRN_2023-Sustainability-Report_20250110.pdf.	Cobalt output contained in MHP	Product flows (P)	Co-/By-product	tonnes per year	875	0.0471038
Note: "Undefined system model": in this table, all values are reported without any allocation

## Sheet: PR5_Ravensthorpe_AU_First Quant
Reference	Flow (As reported by the authors)	Type of flow	Classification of flows	Unit (As reported by the authors)	Total annual amount (Raw data as reported)	Inputs and Outputs Intensity (/ktonne Ni in MHP)
First Quantum Minerals Ltd. Environmental, Social and Governance Report 2023; Report; First Quantum Minerals Ltd., 2024. https://www.first-quantum.com/wp-content/uploads/2024/05/FINAL-2023-ESG-Report.pdf.	Scope 1 - GHG emissions	Output flows (O)	O to env - air	KT of CO2e equivalent	252	11.4545
First Quantum Minerals Ltd. Environmental, Social and Governance Report 2023; Report; First Quantum Minerals Ltd., 2024. https://www.first-quantum.com/wp-content/uploads/2024/05/FINAL-2023-ESG-Report.pdf.	Hydrocarbon Fuel	Input flows (I)	I from tech - electricity/heat	TJ	571	25.9545
First Quantum Minerals Ltd. Environmental, Social and Governance Report 2023; Report; First Quantum Minerals Ltd., 2024. https://www.first-quantum.com/wp-content/uploads/2024/05/FINAL-2023-ESG-Report.pdf.	Suphur	Input flows (I)	I from tech - electricity/heat	TJ	1105	50.2273
First Quantum Minerals Ltd. Environmental, Social and Governance Report 2023; Report; First Quantum Minerals Ltd., 2024. https://www.first-quantum.com/wp-content/uploads/2024/05/FINAL-2023-ESG-Report.pdf.	Sulphur Dioxide (SO₂) emissions	Output flows (O)	O to env - air	metric tonnes	785	35.6818
First Quantum Minerals Ltd. Environmental, Social and Governance Report 2023; Report; First Quantum Minerals Ltd., 2024. https://www.first-quantum.com/wp-content/uploads/2024/05/FINAL-2023-ESG-Report.pdf.	Particulate Matter (PM) emissions	Output flows (O)	O to env - air	metric tonnes	28	1.27273
First Quantum Minerals Ltd. Environmental, Social and Governance Report 2023; Report; First Quantum Minerals Ltd., 2024. https://www.first-quantum.com/wp-content/uploads/2024/05/FINAL-2023-ESG-Report.pdf.	Nitrogen oxides (NOx) emissions	Output flows (O)	O to env - air	metric tonnes	96	4.36364
First Quantum Minerals Ltd. Environmental, Social and Governance Report 2023; Report; First Quantum Minerals Ltd., 2024. https://www.first-quantum.com/wp-content/uploads/2024/05/FINAL-2023-ESG-Report.pdf.	Non-Hazardous Waste	Output flows (O)	O to tech - waste	metric tonnes	4357	198.045
First Quantum Minerals Ltd. Environmental, Social and Governance Report 2023; Report; First Quantum Minerals Ltd., 2024. https://www.first-quantum.com/wp-content/uploads/2024/05/FINAL-2023-ESG-Report.pdf.	Hazardous waste	Output flows (O)	O to tech - waste	metric tonnes	95	4.31818
First Quantum Minerals Ltd. Environmental, Social and Governance Report 2023; Report; First Quantum Minerals Ltd., 2024. https://www.first-quantum.com/wp-content/uploads/2024/05/FINAL-2023-ESG-Report.pdf.	Nickel Production	Product flows (P)	Reference product (of unit operation)	kt	22	1
Note: "Undefined system model": in this table, all values are reported without any allocation

## Sheet: PR6_Nova Operation_AU_IGO
Reference	Flow (As reported by the authors)	Type of flow	Classification of flows	Unit (As reported by the authors)	Total annual amount (Raw data as reported)	Inputs and Outputs Intensity (/tonne Ni in concentrate)
IGO Limited (2022) Sustainability Report 2022. Report. IGO Limited. Available at: https://www.igo.com.au/site/pdf/bb31abd5-2374-460e-ada3-96f2cad3abaa/2022-Sustainability-Report.pdf.	dry tailings deposited	Output flows (O)	O to tech - waste	t	1421745	53.2988
IGO Limited (2022) Sustainability Report 2022. Report. IGO Limited. Available at: https://www.igo.com.au/site/pdf/bb31abd5-2374-460e-ada3-96f2cad3abaa/2022-Sustainability-Report.pdf.	waste rock generated	Output flows (O)	O to tech - waste	t	154300	5.78444
IGO Limited (2022) Sustainability Report 2022. Report. IGO Limited. Available at: https://www.igo.com.au/site/pdf/bb31abd5-2374-460e-ada3-96f2cad3abaa/2022-Sustainability-Report.pdf.	Scope 1 emissions	Output flows (O)	O to env - air	t CO₂-e	61255	2.29634
IGO Limited (2022a) Annual Report 2022. Perth, Western Australia: IGO Limited. Available at: https://www.igo.com.au/site/pdf/200c4e90-bf4e-4231-961a-dacc64e9a556/2022-Annual-Report-to-Shareholders.pdf.	Nickel (metal in concentrate)	Product flows (P)	Reference product (of unit operation)	tonnes	26675	1
IGO Limited (2022a) Annual Report 2022. Perth, Western Australia: IGO Limited. Available at: https://www.igo.com.au/site/pdf/200c4e90-bf4e-4231-961a-dacc64e9a556/2022-Annual-Report-to-Shareholders.pdf.	Copper (metal in concentrate)	Product flows (P)	Co-/By-product	tonnes	11483	0.430478
IGO Limited (2022a) Annual Report 2022. Perth, Western Australia: IGO Limited. Available at: https://www.igo.com.au/site/pdf/200c4e90-bf4e-4231-961a-dacc64e9a556/2022-Annual-Report-to-Shareholders.pdf.	Cobalt (metal in concentrate)	Product flows (P)	Co-/By-product	tonnes	982	0.0368135
Note: "Undefined system model": in this table, all values are reported without any allocation

## Sheet: PR7_RTN_PH_Nickel Asia Co
Reference	Flow (As reported by the authors)	Type of flow	Classification of flows	Unit (As reported by the authors)	Total annual amount (Raw data as reported)	Inputs and Outputs Intensity (/tonne Ni in ore)
Nickel Asia Corporation. Integrated Report 2023; Report; Nickel Asia Corporation, 2024. https://nickelasia.com/assets/documents/NAC-Integrated-Report-2023.pdf.	GHG (Scope 1)	Output flows (O)	O to env - air	TCO₂	22771.7	0.417192
Nickel Asia Corporation. Integrated Report 2023; Report; Nickel Asia Corporation, 2024. https://nickelasia.com/assets/documents/NAC-Integrated-Report-2023.pdf.	Non-Hazardous Waste Diverted from Disposal	Output flows (O)	O to tech - waste	kg	181110	3.31805
Nickel Asia Corporation. Integrated Report 2023; Report; Nickel Asia Corporation, 2024. https://nickelasia.com/assets/documents/NAC-Integrated-Report-2023.pdf.	Hazardous Waste Diverted from Disposal	Output flows (O)	O to tech - waste	kg	11	0.000201527
Nickel Asia Corporation. Integrated Report 2023; Report; Nickel Asia Corporation, 2024. https://nickelasia.com/assets/documents/NAC-Integrated-Report-2023.pdf.	Non-Hazardous Waste Directed to Disposal	Output flows (O)	O to tech - waste	kg	59120	1.08311
Nickel Asia Corporation. Integrated Report 2023; Report; Nickel Asia Corporation, 2024. https://nickelasia.com/assets/documents/NAC-Integrated-Report-2023.pdf.	Hazardous Waste Directed to Disposal	Output flows (O)	O to tech - waste	kg	56313.6	1.0317
Nickel Asia Corporation. Integrated Report 2023; Report; Nickel Asia Corporation, 2024. https://nickelasia.com/assets/documents/NAC-Integrated-Report-2023.pdf.	Total fuel consumption	Input flows (I)	I from technosphere (tech) - materials/fuels	L	9310747	170.579
Nickel Asia Corporation. Integrated Report 2023; Report; Nickel Asia Corporation, 2024. https://nickelasia.com/assets/documents/NAC-Integrated-Report-2023.pdf.	Total electricity consumption	Input flows (I)	I from tech - electricity/heat	MwH	2014.89	0.036914
Own calculations	Nickel content	Product flows (P)	Reference product (of unit operation)	tonnes	54583.3	1
Own calculations	Iron content	Product flows (P)	Co-/By-product	tonnes	1.04935e+06	19.2248
Note: "Undefined system model": in this table, all values are reported without any allocation

## Sheet: PR8_TMC_PH_Nickel Asia Co
Reference	Flow (As reported by the authors)	Type of flow	Classification of flows	Unit (As reported by the authors)	Total annual amount (Raw data as reported)	Inputs and Outputs Intensity (/tonne Ni in ore)
Nickel Asia Corporation. Integrated Report 2023; Report; Nickel Asia Corporation, 2024. https://nickelasia.com/assets/documents/NAC-Integrated-Report-2023.pdf.	GHG (Scope 1)	Output flows (O)	O to env - air	TCO₂	62203.7	0.72184
Nickel Asia Corporation. Integrated Report 2023; Report; Nickel Asia Corporation, 2024. https://nickelasia.com/assets/documents/NAC-Integrated-Report-2023.pdf.	Non-Hazardous Waste Diverted from Disposal	Output flows (O)	O to tech - waste	kg	20074.6	0.232955
Nickel Asia Corporation. Integrated Report 2023; Report; Nickel Asia Corporation, 2024. https://nickelasia.com/assets/documents/NAC-Integrated-Report-2023.pdf.	Hazardous Waste Diverted from Disposal	Output flows (O)	O to tech - waste	kg	0	0
Nickel Asia Corporation. Integrated Report 2023; Report; Nickel Asia Corporation, 2024. https://nickelasia.com/assets/documents/NAC-Integrated-Report-2023.pdf.	Non-Hazardous Waste Directed to Disposal	Output flows (O)	O to tech - waste	kg	7980.53	0.0926097
Nickel Asia Corporation. Integrated Report 2023; Report; Nickel Asia Corporation, 2024. https://nickelasia.com/assets/documents/NAC-Integrated-Report-2023.pdf.	Hazardous Waste Directed to Disposal	Output flows (O)	O to tech - waste	kg	251651	2.92027
Nickel Asia Corporation. Integrated Report 2023; Report; Nickel Asia Corporation, 2024. https://nickelasia.com/assets/documents/NAC-Integrated-Report-2023.pdf.	Total fuel consumption	Input flows (I)	I from technosphere (tech) - materials/fuels	L	1.07681e+07	124.958
Nickel Asia Corporation. Integrated Report 2023; Report; Nickel Asia Corporation, 2024. https://nickelasia.com/assets/documents/NAC-Integrated-Report-2023.pdf.	Total electricity consumption	Input flows (I)	I from tech - electricity/heat	MwH	3187.01	0.0369835
Own calculations	Nickel content	Product flows (P)	Reference product (of unit operation)	tonnes	86173.8	1
Own calculations	Iron content	Product flows (P)	Co-/By-product	tonnes	2.87229e+06	33.3314
Note: "Undefined system model": in this table, all values are reported without any allocation

[truncated: 8 more sheets: PR9_HMC_PH_Nickel Asia Co, PR10_CMC_PH_Nickel Asia Co, PR11_DMC_PH_Nickel Asia Co, PR12_TBP+GPS_ID_PT Trimegah Ba , PR13_MSP_ID_PT Trimegah Bangun , PR14_HPL_ID_PT Trimegah Bangun , PR15_HJF_ID_PT Trimegah Bangun , PR16_AMVI_PH_TVI Resource Devel]
