# Supplementary material
Source: Research Square preprint supplement (doi:10.21203/rs.3.rs-9280837/v1)
Supplement: Supplementary file 2 [file a83797c59468f3374e8137fc.xlsx]

## Sheet: ReportReference
Operator	Reference report
29Metals Limited	29Metals Limited. 2023. 2023 Sustainability & ESG Report. 29Metals Limited. https://assets-global.website-files.com/6621fd607c97947f335cafc6/6621fd607c97947f335cafc6_2023%20Sustainability%20%26%20ESG%20Report.pdf
29Metals Limited	29Metals Limited. 2024. 2023 Appendix 4E and Annual Financial Report. 29Metals Limited. https://assets-global.website-files.com/640b21824379a3d73f0eecde/65d7bb67a54f92eb72212777_2023%20Appendix%204E%20and%20Annual%20Financial%20Report.pdf.
Aeris Resources Limited	Aeris Resources Limited. 2024a. Annual Report 2024. Aeris Resources Limited. https://aerisresources.com.au/wp-content/uploads/2024/10/Aeris_AR_2024_WEB.pdf
Aeris Resources Limited	Aeris Resources Limited. 2024b. Sustainability Report 2024. Aeris Resources Limited. https://aerisresources.com.au/wp-content/uploads/2024/10/Aeris-Sustainability-2024-v1.pdf
Antofagasta plc	Antofagasta plc. 2020. Sustainability Report 2020. Antofagasta plc. https://www.antofagasta.co.uk/media/4177/antofagasta_sustainability-report_2020.pdf
Antofagasta plc	Antofagasta plc. 2020. Annual Report and Financial Statements 2020. Antofagasta plc. https://prod.antofagasta.co.uk/media/4098/antofagasta_2020_annual_report.pdf
Atalaya Mining plc	Atalaya Mining plc. 2023. Sustainability Report 2023. Atalaya Mining plc. https://wp-atalaya-mining-2022.s3.eu-west-2.amazonaws.com/media/2024/05/ATM_Sustainability_Report_2023_digital_red3.pdf
Capstone Copper Corp.	Capstone Copper Corp. 2022. Growing Responsibly: Sustainability Report 2022. Capstone Copper Corp. https://capstonecopper.com/wp-content/uploads/2023/04/CapstoneCopper_SustainabilityReport2022_GrowingResponsibly.pdf
Centerra Gold Inc.	Centerra Gold Inc. 2023. 2023 ESG Report. Centerra Gold Inc. https://s23.q4cdn.com/282178423/files/doc_downloads/esg/2024/Centerra-Gold-2023-ESG-Report.pdf
Central Asia Metals plc	Central Asia Metals plc. 2023. Sustainability Report 2023. Central Asia Metals plc. https://wp-caml-2023.s3.eu-west-2.amazonaws.com/media/2023/12/Central-Asia-Metals-Plc-Sustainability-Report-2023-1.pdf
China Gold International Resources Corp. Ltd.	China Gold International Resources Corp. Ltd. 2023. ESG Report 2023. China Gold International Resources Corp. Ltd. http://www.chinagoldintl.com/_resources/esg/2023-ESG-report-eng.pdf
Codelco	Corporación Nacional del Cobre de Chile (Codelco). 2023. Sustainability Report 2023. Codelco. https://www.codelco.com/prontus_codelco/site/artic/20240712/asocfile/20240712111813/rs_english_12_julio.pdf
Ero Copper Corp.	Ero Copper Corp. 2023. 2023 Sustainability Report: Born in Brazil, Built for Tomorrow. Ero Copper Corp. https://erocopper.com/site/assets/files/6519/erocopper_2023_sustainability_report.pdf
Freeport-McMoRan Inc.	Freeport-McMoRan Inc. 2023. 2023 Annual Report on Sustainability: The Value of Copper. Freeport-McMoRan Inc. https://www.fcx.com/sites/fcx/files/documents/sustainability/2023-annual-report-on-sustainability.pdf
KAZ Minerals	KAZ Minerals. 2024. Sustainability Report 2024. KAZ Minerals International DMCC. https://www.kazminerals.com/media/23238/sustainibility_report_2024_web.pdf
Minsur S.A.	Minsur S.A. 2023. Sustainability Report 2023. Minsur S.A. https://www.minsur.com/wp-content/uploads/pdf/ReporteSostenibilidad/ENG/SustainabilityReportMinsur2023.pdf
MMG Las Bambas S.A.	MMG Las Bambas S.A. 2020. Las Bambas Sustainability Report 2020. MMG Limited / Las Bambas S.A. https://www.mmg.com/wp-content/uploads/2021/05/Las-Bambas-Sustainability-Report-2020.pdf
MMG Limited	MMG Limited. 2023a. Annual Report 2023. MMG Limited. https://www.mmg.com/wp-content/uploads/2024/04/MMG-2023-Annual-Report.pdf
MMG Limited	MMG Limited. 2023b. Sustainability Report 2023. MMG Limited. https://www.mmg.com/wp-content/uploads/2024/07/MMG_2023_SustainabilityReport.pdf
PT Amman Mineral Internasional Tbk	PT Amman Mineral Internasional Tbk. 2023. Sustainability Report 2023. PT Amman Mineral Internasional Tbk. https://www.amman.co.id/wp-content/uploads/2024/04/AMMN-SR-2023_ENG.pdf
PT Merdeka Copper Gold Tbk	PT Merdeka Copper Gold Tbk. 2021. Laporan Keberlanjutan 2021 / Sustainability Report 2021. PT Merdeka Copper Gold Tbk. https://merdekacoppergold.com/wp-content/uploads/2022/06/MDKA_2021_Laporan-Keberlanjutan.pdf
Sierra Gorda SCM	Sierra Gorda SCM. 2018. Sustainability Report 2018. Sierra Gorda SCM. https://www.sgscm.cl/uploads/Reporte/VB_Inside_Sustainability_Report_SG_2018_19%20julio.pdf
Taseko Mines Limited	Taseko Mines Limited. 2023. 2023 ESG Report. Taseko Mines Limited. https://www.tasekomines.com/site/assets/files/2255/esg_report_2023.pdf

## Sheet: PR_Overview
PR	Reference year	Operator name	Site/Mine name	Country	Process Description	Primary commodity	Co/by Products	Deposit	helper column E
PR1	2024	Aeris Resources Limited	Tritton	Australia	Active underground copper operation. Ore is processed via crushing, grinding and milling; the operation produces copper concentrate for export.	Copper concentrate	Gold, Silver	Volcanogenic Massive Sulfide (VMS)	Flotation (concentrator)
PR2	2024		Jaguar	Australia	Underground zinc-copper-silver operation at the Bentley deposit. Uses open stoping and a 600 ktpa processing plant producing copper and zinc concentrates with precious-metal by-products.	Zinc	Copper concentrate, Silver	Volcanogenic Massive Sulfide (VMS)	Flotation (concentrator)
PR3	2024		North Queensland	Australia	Originally open-cut, later transitioned to underground. ROM ore is crushed on site and transported for toll treatment; produces copper-gold concentrate.	Copper	Gold	Iron Oxide Copper Gold (IOCG)	Flotation (concentrator)
PR4	2020	Antofagasta plc	Los Pelambres	Chile	Open-pit copper operation using milling and flotation.	Copper concentrate	Molybdenum,Gold,Silver	Porphyry Deposit	Flotation (concentrator)
PR5	2020		Centinela	Chile	Mixed sulphide and oxide operation. Milling and flotation produce copper concentrate; SX-EW produces copper cathodes from oxide ores.	Copper concentrate and copper cathode	Molybdenum,Gold	Porphyry Deposit	Mixed
PR6	2020		Antucoya	Chile	Open-pit oxide operation using heap leaching and SX-EW to produce copper cathodes.	Copper cathode	-	Porphyry Deposit	hydrometallurgy
PR7	2020		Zaldívar	Chile	Open-pit heap-leach copper operation producing copper cathodes via SX-EW.	Copper cathode	-	Porphyry Deposit	hydrometallurgy
PR8	2020	Atalaya Mining Copper	Riotinto plant	Spain	Open-pit copper operation in the Iberian Pyrite Belt. Processing produces copper in concentrate.	Copper concentrate	-	Volcanogenic Massive Sulfide (VMS)	Flotation (concentrator)
PR9	2022	Capstone copper	Pinto Valley	USA	Open-pit copper operation with a mill and electrowinning facility. The mill produces copper and molybdenum concentrates; the site also produces copper cathodes.	Copper concentrate and copper cathode	Molybdenum	Porphyry Deposit	Mixed
PR10	2022		Cozamin	Chile	Underground copper-silver mine with a surface milling facility.	Copper concentrate and copper cathode	Zinc, Silver	Porphyry Deposit	Mixed
PR11	2022		Mantos Blancos	Chile	Open-pit operation processing both sulphide and oxide ores. sulphide concentrator (flotation) + oxide leach/SX-EW; Produces copper concentrate and copper cathodes.	Copper concentrate and copper cathode	Silver	Iron Oxide Copper Gold (IOCG)	Mixed
PR12	2022		Mantoverde	Mexico	Operation combining sulphide concentration with ROM leaching and conventional SX-EW. Produces copper concentrate and LME Grade A copper cathodes.	Copper concentrate and copper cathode	Gold	Iron Oxide Copper Gold (IOCG)	Mixed
PR13	2023	Central Asia Metals plc	Kounrad (Kounrad Dump)	Kazakhstan	SX-EW plant recovering copper from historic waste dumps. Produces copper cathodes.	Copper cathode	-	Porphyry Deposit	hydrometallurgy
PR14	2023		Sasa	North Macedonia	Underground; processing plant uses lead & zinc flotation producing separate Pb and Zn concentrates (Ag associated)	Zinc	Lead	Porphyry Deposit	Flotation (concentrator)
PR15	2023	China Gold International Resources Corp. Ltd.	Jiama	China	Large copper-gold polymetallic operation in the Gangdise Belt. processing includes bulk/ selective flotation circuits producing concentrates (Cu-polymetallic)	Copper concentrate	Gold, Silver, Lead, Zinc, Molybdenum	Porphyry Deposit	Flotation (concentrator)
PR16	2023	Ero Copper Corp.	Caraíba	Brazil	Integrated copper mining and processing complex including underground mines and an open pit. Ore is processed by crushing and flotation to produce high-grade copper concentrate.	Copper concentrate	-	Layered Mafic-Ultramafic Intrusion	Flotation (concentrator)
PR17	2023		Tucuma	Brazil	Open-pit copper operation. Ore is processed at a sulphide processing facility (crushing + milling + flotation)	Copper concentrate	-	Layered Mafic-Ultramafic Intrusion	Flotation (concentrator)
PR18	2023	Freeport-McMoRan Inc.	Bagdad	USA	Open-pit copper-molybdenum complex with concentrator, concentrate leach processing (CLP) and long-running SX-EW facilities.	Copper concentrate and copper cathode	Molybdenum	Porphyry Deposit	Mixed
PR19	2023		Chino(Cobre)	USA	Open-pit operation with both concentrator (flotation) and leach/SX-EW circuits.	Copper concentrate and copper cathode	-	Porphyry Deposit	Mixed
PR20	2023		Morenci	USA	Large open-pit operation with two concentrators, leach systems, SX plants and EW tank houses. Produces copper concentrate and copper cathodes.	Copper concentrate and copper cathode	Molybdenum	Porphyry Deposit	Mixed
PR21	2023		Safford (Lone Star)	USA	Open-pit mining complex using leaching and SX-EW.	Copper cathode	-	Porphyry Deposit	hydrometallurgy
PR22	2023		Sierrita	USA	Open-pit operation producing copper and molybdenum concentrates, with additional SX-EW copper cathode from ROM oxide leaching.	Copper concentrate and copper cathode	Molybdenum, Silver	Porphyry Deposit	Mixed
PR23	2023		Tyrone	USA	Open-pit mining complex using leaching and SX-EW.	Copper cathode	-	Porphyry Deposit	hydrometallurgy
PR24	2023		Cerro Verde	Peru	Operation including concentrator and leach/SX-EW capacity. Site-level products include copper concentrate and copper cathode.	Copper concentrate and copper cathode	Molybdenum, Silver	Porphyry Deposit	Mixed
PR25	2023		El Abra	Chile	Heap-leach / SX-EW type copper production.	Copper cathode	-	Porphyry Deposit	hydrometallurgy
PR26	2024	KAZ Minerals Limited	Aktogay	Kazakhstan	Mine with two sulphide concentrators and a smaller oxide plant. Produces copper concentrate from sulphides and copper cathode from oxide ores.	Copper concentrate and copper cathode	Molybdenum,Gold,Silver	Porphyry Deposit	Mixed
PR27	2024		Bozshakol	Kazakhstan	Open-pit mine processing sulphide and clay ore (25 Mt/y sulphide concentrator + 5 Mt/y clay plant (separate processing) )producing Cu concentrate	Copper concentrate	Molybdenum,Gold,Silver	Porphyry Deposit	Flotation (concentrator)
PR28	2024		Bozymchak	Kyrgyzstan	Copper-gold operation that transitioned from open-pit to underground mining. Produces copper-gold concentrate for smelting in Kazakhstan.	Copper concentrate	Gold	Porphyry Deposit	Flotation (concentrator)
PR29	2024		East Region Operations	Kazakhstan	Three underground mines in Kazakhstan (Artemyevsky, Orlovsky and Irtyshsky). Outputs include copper and by-products in concentrate.	Copper concentrate	Gold, Silver, Zinc	Volcanogenic Massive Sulfide (VMS)	Flotation (concentrator)
PR30	2023	MMG Limited	Kinsevere	Dem. Rep. Congo	Operation producing copper cathode. Mining and processing include crushing, grinding, acid leaching, solvent extraction and electrowinning.	Copper cathode	Cobalt	Sediment Hosted (Reduced Facies)	Mixed
PR31	2023		Las Bambas	Peru	Conventional copper operation : ore crushed and conveyed to conventional flotation producing copper concentrate and molybdenum concentrate, with gold and silver by-products.	Copper concentrate	Molybdenum	Porphyry Deposit, Skarn (Metasomatic)	Flotation (concentrator)
PR32	2023		Rosebery	Australia	Uses mechanised underground mining method followed by crushing, grinding and floatation processes.	Zinc	Copper Concentrate, Lead, Gold, Silver	Volcanogenic Massive Sulfide (VMS)	Flotation (concentrator)
PR33	2023		Dugald River	Australia	Operation predominantly producing zinc concentrate, with lead and silver by-products. By crushing, grinding and sequential flotation	Zinc	Zinc, Lead, Silver	Sedimentary Exhalative (SEDEX)	Flotation (concentrator)
PR34	2023	Minsur	Mina Justa	Peru	Copper operation with two conventional open pits and two processing facilities: an oxide plant and a sulphide concentrator.	Copper concentrate and copper cathode	-	Iron Oxide Copper Gold (IOCG)	Mixed
PR35	2023	29Metals Limited	Golden Grove	Australia	High-grade copper-zinc-precious metals mining operation with underground mines. Primarily concentrate sold to smelters in China, Korea and Japan.	Copper concentrate	Zinc, lead, Gold, Silver	Volcanogenic Massive Sulfide (VMS)	Flotation (concentrator)
PR36	2021	PT Merdeka Copper Gold Tbk	Tujuh Bukit	Indonesia	Gold Mine, (Tujuh bukit Copper is a Large pre-production copper project located beneath the operating Tujuh bukit Gold Mine)	Gold	-	Porphyry Deposit	Flotation (concentrator)
PR37	2021		Wetar copper mine	Indonesia	Operation in Indonesia producing and exporting high-quality copper cathode via SX-EW.	Copper cathode	-	Volcanogenic Massive Sulfide (VMS)	hydrometallurgy
PR38	2023	PT Amman Mineral Internasional Tbk	Batu Hijau	Indonesia	Large open-pit copper-gold mine in West Sumbawa. Operates as a copper-gold mining operation and produces copper concentrate.	Copper concentrate	Gold, Silver	Porphyry Deposit	Flotation (concentrator)
PR39	2018	Sierra Gorda SCM	Sierra Gorda SCM	Chile	Copper-molybdenum mining project in Chile focused on extraction, processing and marketing of concentrates.	Copper concentrate	Molybdenum, Gold	Porphyry Deposit	Flotation (concentrator)
PR40	2023	Taseko Mines Limited	Gibraltar	Canada	Conventional open-pit mine extracting ore from a low-grade copper-molybdenum porphyry deposit. Using Milling + flotation producing a Cu-Mo bulk concentrate, then flotation separation	Copper concentrate	Molybdenum	Porphyry Deposit	Flotation (concentrator)

## Sheet: PR_Reference
PR	Operator name	Reference
PR1	Aeris Resources Limited	Aeris Resources Limited. 2024a. Annual Report 2024. Aeris Resources Limited. https://aerisresources.com.au/wp-content/uploads/2024/10/Aeris_AR_2024_WEB.pdf
	Aeris Resources Limited	Aeris Resources Limited. 2024b. Sustainability Report 2024. Aeris Resources Limited. https://aerisresources.com.au/wp-content/uploads/2024/10/Aeris-Sustainability-2024-v1.pdf
PR2	Aeris Resources Limited	Aeris Resources Limited. 2024a. Annual Report 2024. Aeris Resources Limited. https://aerisresources.com.au/wp-content/uploads/2024/10/Aeris_AR_2024_WEB.pdf
	Aeris Resources Limited	Aeris Resources Limited. 2024b. Sustainability Report 2024. Aeris Resources Limited. https://aerisresources.com.au/wp-content/uploads/2024/10/Aeris-Sustainability-2024-v1.pdf
PR3	Aeris Resources Limited	Aeris Resources Limited. 2024b. Sustainability Report 2024. Aeris Resources Limited. https://aerisresources.com.au/wp-content/uploads/2024/10/Aeris-Sustainability-2024-v1.pdf
PR4	Antofagasta plc	Antofagasta plc. 2020. Sustainability Report 2020. Antofagasta plc. https://www.antofagasta.co.uk/media/4177/antofagasta_sustainability-report_2020.pdf
PR5	Antofagasta plc	Antofagasta plc. 2020. Sustainability Report 2020. Antofagasta plc. https://www.antofagasta.co.uk/media/4177/antofagasta_sustainability-report_2020.pdf
	Antofagasta plc	Antofagasta plc. 2020. Annual Report and Financial Statements 2020. Antofagasta plc. https://prod.antofagasta.co.uk/media/4098/antofagasta_2020_annual_report.pdf
PR6	Antofagasta plc	Antofagasta plc. 2020. Sustainability Report 2020. Antofagasta plc. https://www.antofagasta.co.uk/media/4177/antofagasta_sustainability-report_2020.pdf
PR7	Antofagasta plc	Antofagasta plc. 2020. Sustainability Report 2020. Antofagasta plc. https://www.antofagasta.co.uk/media/4177/antofagasta_sustainability-report_2020.pdf
PR8	Atalaya Mining plc	Atalaya Mining plc. 2023. Sustainability Report 2023. Atalaya Mining plc. https://wp-atalaya-mining-2022.s3.eu-west-2.amazonaws.com/media/2024/05/ATM_Sustainability_Report_2023_digital_red3.pdf
PR9	Capstone Copper Corp.	Capstone Copper Corp. 2022. Growing Responsibly: Sustainability Report 2022. Capstone Copper Corp. https://capstonecopper.com/wp-content/uploads/2023/04/CapstoneCopper_SustainabilityReport2022_GrowingResponsibly.pdf
PR10	Capstone Copper Corp.	Capstone Copper Corp. 2022. Growing Responsibly: Sustainability Report 2022. Capstone Copper Corp. https://capstonecopper.com/wp-content/uploads/2023/04/CapstoneCopper_SustainabilityReport2022_GrowingResponsibly.pdf
PR11	Capstone Copper Corp.	Capstone Copper Corp. 2022. Growing Responsibly: Sustainability Report 2022. Capstone Copper Corp. https://capstonecopper.com/wp-content/uploads/2023/04/CapstoneCopper_SustainabilityReport2022_GrowingResponsibly.pdf
PR12	Capstone Copper Corp.	Capstone Copper Corp. 2022. Growing Responsibly: Sustainability Report 2022. Capstone Copper Corp. https://capstonecopper.com/wp-content/uploads/2023/04/CapstoneCopper_SustainabilityReport2022_GrowingResponsibly.pdf
PR13	Central Asia Metals plc	Central Asia Metals plc. 2023. Sustainability Report 2023. Central Asia Metals plc. https://wp-caml-2023.s3.eu-west-2.amazonaws.com/media/2023/12/Central-Asia-Metals-Plc-Sustainability-Report-2023-1.pdf
PR14	Central Asia Metals plc	Central Asia Metals plc. 2023. Sustainability Report 2023. Central Asia Metals plc. https://wp-caml-2023.s3.eu-west-2.amazonaws.com/media/2023/12/Central-Asia-Metals-Plc-Sustainability-Report-2023-1.pdf
PR15	China Gold International Resources Corp. Ltd.	China Gold International Resources Corp. Ltd. 2023. ESG Report 2023. China Gold International Resources Corp. Ltd. http://www.chinagoldintl.com/_resources/esg/2023-ESG-report-eng.pdf
PR16	Ero Copper Corp.	Ero Copper Corp. 2023. 2023 Sustainability Report: Born in Brazil, Built for Tomorrow. Ero Copper Corp. https://erocopper.com/site/assets/files/6519/erocopper_2023_sustainability_report.pdf
PR17	Ero Copper Corp.	Ero Copper Corp. 2023. 2023 Sustainability Report: Born in Brazil, Built for Tomorrow. Ero Copper Corp. https://erocopper.com/site/assets/files/6519/erocopper_2023_sustainability_report.pdf
PR18	Freeport-McMoRan Inc.	Freeport-McMoRan Inc. 2023. 2023 Annual Report on Sustainability: The Value of Copper. Freeport-McMoRan Inc. https://www.fcx.com/sites/fcx/files/documents/sustainability/2023-annual-report-on-sustainability.pdf
PR19	Freeport-McMoRan Inc.	Freeport-McMoRan Inc. 2023. 2023 Annual Report on Sustainability: The Value of Copper. Freeport-McMoRan Inc. https://www.fcx.com/sites/fcx/files/documents/sustainability/2023-annual-report-on-sustainability.pdf
PR20	Freeport-McMoRan Inc.	Freeport-McMoRan Inc. 2023. 2023 Annual Report on Sustainability: The Value of Copper. Freeport-McMoRan Inc. https://www.fcx.com/sites/fcx/files/documents/sustainability/2023-annual-report-on-sustainability.pdf
PR21	Freeport-McMoRan Inc.	Freeport-McMoRan Inc. 2023. 2023 Annual Report on Sustainability: The Value of Copper. Freeport-McMoRan Inc. https://www.fcx.com/sites/fcx/files/documents/sustainability/2023-annual-report-on-sustainability.pdf
PR22	Freeport-McMoRan Inc.	Freeport-McMoRan Inc. 2023. 2023 Annual Report on Sustainability: The Value of Copper. Freeport-McMoRan Inc. https://www.fcx.com/sites/fcx/files/documents/sustainability/2023-annual-report-on-sustainability.pdf
PR23	Freeport-McMoRan Inc.	Freeport-McMoRan Inc. 2023. 2023 Annual Report on Sustainability: The Value of Copper. Freeport-McMoRan Inc. https://www.fcx.com/sites/fcx/files/documents/sustainability/2023-annual-report-on-sustainability.pdf
PR24	Freeport-McMoRan Inc.	Freeport-McMoRan Inc. 2023. 2023 Annual Report on Sustainability: The Value of Copper. Freeport-McMoRan Inc. https://www.fcx.com/sites/fcx/files/documents/sustainability/2023-annual-report-on-sustainability.pdf
PR25	Freeport-McMoRan Inc.	Freeport-McMoRan Inc. 2023. 2023 Annual Report on Sustainability: The Value of Copper. Freeport-McMoRan Inc. https://www.fcx.com/sites/fcx/files/documents/sustainability/2023-annual-report-on-sustainability.pdf
PR26	KAZ Minerals	KAZ Minerals. 2024. Sustainability Report 2024. KAZ Minerals International DMCC. https://www.kazminerals.com/media/23238/sustainibility_report_2024_web.pdf
PR27	KAZ Minerals	KAZ Minerals. 2024. Sustainability Report 2024. KAZ Minerals International DMCC. https://www.kazminerals.com/media/23238/sustainibility_report_2024_web.pdf
PR28	KAZ Minerals	KAZ Minerals. 2024. Sustainability Report 2024. KAZ Minerals International DMCC. https://www.kazminerals.com/media/23238/sustainibility_report_2024_web.pdf
PR29	KAZ Minerals	KAZ Minerals. 2024. Sustainability Report 2024. KAZ Minerals International DMCC. https://www.kazminerals.com/media/23238/sustainibility_report_2024_web.pdf
PR30	MMG Limited	MMG Limited. 2023a. Annual Report 2023. MMG Limited. https://www.mmg.com/wp-content/uploads/2024/04/MMG-2023-Annual-Report.pdf
	MMG Limited	MMG Limited. 2023b. Sustainability Report 2023. MMG Limited. https://www.mmg.com/wp-content/uploads/2024/07/MMG_2023_SustainabilityReport.pdf
PR31	MMG Limited	MMG Limited. 2023a. Annual Report 2023. MMG Limited. https://www.mmg.com/wp-content/uploads/2024/04/MMG-2023-Annual-Report.pdf
	MMG Limited	MMG Limited. 2023b. Sustainability Report 2023. MMG Limited. https://www.mmg.com/wp-content/uploads/2024/07/MMG_2023_SustainabilityReport.pdf
PR32	MMG Limited	MMG Limited. 2023a. Annual Report 2023. MMG Limited. https://www.mmg.com/wp-content/uploads/2024/04/MMG-2023-Annual-Report.pdf
	MMG Limited	MMG Limited. 2023b. Sustainability Report 2023. MMG Limited. https://www.mmg.com/wp-content/uploads/2024/07/MMG_2023_SustainabilityReport.pdf
PR33	MMG Limited	MMG Limited. 2023a. Annual Report 2023. MMG Limited. https://www.mmg.com/wp-content/uploads/2024/04/MMG-2023-Annual-Report.pdf
	MMG Limited	MMG Limited. 2023b. Sustainability Report 2023. MMG Limited. https://www.mmg.com/wp-content/uploads/2024/07/MMG_2023_SustainabilityReport.pdf
PR 34	Minsur S.A.	Minsur S.A. 2023. Sustainability Report 2023. Minsur S.A. https://www.minsur.com/wp-content/uploads/pdf/ReporteSostenibilidad/ENG/SustainabilityReportMinsur2023.pdf
PR 35	29Metals Limited	29Metals Limited. 2023. 2023 Sustainability & ESG Report. 29Metals Limited. https://assets-global.website-files.com/6621fd607c97947f335cafc6/6621fd607c97947f335cafc6_2023%20Sustainability%20%26%20ESG%20Report.pdf
	29Metals Limited	29Metals Limited. 2024. 2023 Appendix 4E and Annual Financial Report. 29Metals Limited. https://assets-global.website-files.com/640b21824379a3d73f0eecde/65d7bb67a54f92eb72212777_2023%20Appendix%204E%20and%20Annual%20Financial%20Report.pdf.
PR 36	PT Merdeka Copper Gold Tbk	PT Merdeka Copper Gold Tbk. 2021. Laporan Keberlanjutan 2021 / Sustainability Report 2021. PT Merdeka Copper Gold Tbk. https://merdekacoppergold.com/wp-content/uploads/2022/06/MDKA_2021_Laporan-Keberlanjutan.pdf
PR 37	PT Merdeka Copper Gold Tbk	PT Merdeka Copper Gold Tbk. 2021. Laporan Keberlanjutan 2021 / Sustainability Report 2021. PT Merdeka Copper Gold Tbk. https://merdekacoppergold.com/wp-content/uploads/2022/06/MDKA_2021_Laporan-Keberlanjutan.pdf
PR 38	PT Amman Mineral Internasional Tbk	PT Amman Mineral Internasional Tbk. 2023. Sustainability Report 2023. PT Amman Mineral Internasional Tbk. https://www.amman.co.id/wp-content/uploads/2024/04/AMMN-SR-2023_ENG.pdf
PR 39	Sierra Gorda SCM	Sierra Gorda SCM. 2018. Sustainability Report 2018. Sierra Gorda SCM. https://www.sgscm.cl/uploads/Reporte/VB_Inside_Sustainability_Report_SG_2018_19%20julio.pdf
PR 40	Taseko Mines Limited	Taseko Mines Limited. 2023. 2023 ESG Report. Taseko Mines Limited. https://www.tasekomines.com/site/assets/files/2255/esg_report_2023.pdf

## Sheet: PR1_Tritton_AU_ Aeris
Reference	Flow (As reported by the authors)	Type of flow	Classification of flows	Unit (As reported)	Total annual amount (Raw data as reported)	Inputs and Outputs Intensity (/tonne Cu concentrate)		Note: "Undefined system model": in this table, all values are reported without any allocation
Aeris Resources Limited. 2024b. Sustainability Report 2024. Aeris Resources Limited. https://aerisresources.com.au/wp-content/uploads/2024/10/Aeris-Sustainability-2024-v1.pdf.	Diesel consumption	Input flows (I)	I from technosphere (tech) - materials/fuels	GJ	338743	17.1951
Aeris Resources Limited. 2024b. Sustainability Report 2024. Aeris Resources Limited. https://aerisresources.com.au/wp-content/uploads/2024/10/Aeris-Sustainability-2024-v1.pdf.	Electricity consumption	Input flows (I)	I from tech - electricity/heat	GJ	302270	15.3437
Aeris Resources Limited. 2024b. Sustainability Report 2024. Aeris Resources Limited. https://aerisresources.com.au/wp-content/uploads/2024/10/Aeris-Sustainability-2024-v1.pdf.	Scope 1 GHG emissions	Output flows (O)	O to env - air	tCO2-e	23781	1.20716
Aeris Resources Limited. 2024b. Sustainability Report 2024. Aeris Resources Limited. https://aerisresources.com.au/wp-content/uploads/2024/10/Aeris-Sustainability-2024-v1.pdf.	Copper concentrate production	Product flows (P)	Reference product (of unit operation)	tonnes	19700	1
Aeris Resources Limited. 2024a. Annual Report 2024. Aeris Resources Limited. https://aerisresources.com.au/wp-content/uploads/2024/10/Aeris_AR_2024_WEB.pdf.	Gold produced	Product flows (P)	Co-/By-product	Oz	4899	0.24868
S&P.2024	Silver prodoction	Product flows (P)	Co-/By-product	Oz	Not disclosed	Not disclosed

## Sheet: PR2_Jaguar_AU_ Aeris
Reference	Flow (As reported by the authors)	Type of flow	Classification of flows	Unit (As reported)	Total annual amount (Raw data as reported)	Inputs and Outputs Intensity (/tonne Cu concentrate)		Note: "Undefined system model": in this table, all values are reported without any allocation
Aeris Resources Limited. 2024b. Sustainability Report 2024. Aeris Resources Limited. https://aerisresources.com.au/wp-content/uploads/2024/10/Aeris-Sustainability-2024-v1.pdf.	Diesel consumption	Input flows (I)	I from technosphere (tech) - materials/fuels	GJ	22534	37.5567
Aeris Resources Limited. 2024b. Sustainability Report 2024. Aeris Resources Limited. https://aerisresources.com.au/wp-content/uploads/2024/10/Aeris-Sustainability-2024-v1.pdf.	Natural Gas consumption	Input flows (I)	I from technosphere (tech) - materials/fuels	GJ	194788	324.647
Aeris Resources Limited. 2024b. Sustainability Report 2024. Aeris Resources Limited. https://aerisresources.com.au/wp-content/uploads/2024/10/Aeris-Sustainability-2024-v1.pdf.	Scope 1 GHG emissions	Output flows (O)	O to env - air	tCO2-e	11619	19.365
Aeris Resources Limited. 2024a. Annual Report 2024. Aeris Resources Limited. https://aerisresources.com.au/wp-content/uploads/2024/10/Aeris_AR_2024_WEB.pdf.	Copper concentrate production	Product flows (P)	Reference product (of unit operation)	tonnes	600	1
Aeris Resources Limited. 2024a. Annual Report 2024. Aeris Resources Limited. https://aerisresources.com.au/wp-content/uploads/2024/10/Aeris_AR_2024_WEB.pdf.	Zinc Produced	Product flows (P)	Co-/By-product	tonnes	3100	5.16667
Aeris Resources Limited. 2024a. Annual Report 2024. Aeris Resources Limited. https://aerisresources.com.au/wp-content/uploads/2024/10/Aeris_AR_2024_WEB.pdf.	Gold Produced	Product flows (P)	Co-/By-product	koz	0.4	0.000666667
Aeris Resources Limited. 2024a. Annual Report 2024. Aeris Resources Limited. https://aerisresources.com.au/wp-content/uploads/2024/10/Aeris_AR_2024_WEB.pdf.	Silver Produced	Product flows (P)	Co-/By-product	koz	84	0.14

## Sheet: PR3_North Queensland_AU_ Aeris
Reference	Flow (As reported by the authors)	Type of flow	Classification of flows	Unit (As reported)	Total annual amount (Raw data as reported)	Inputs and Outputs Intensity (/tonne Cu concentrate)		Note: "Undefined system model": in this table, all values are reported without any allocation
Aeris Resources Limited. 2024b. Sustainability Report 2024. Aeris Resources Limited. https://aerisresources.com.au/wp-content/uploads/2024/10/Aeris-Sustainability-2024-v1.pdf.	Diesel consumption	Input flows (I)	I from technosphere (tech) - materials/fuels	GJ	131511	19.0596
Aeris Resources Limited. 2024b. Sustainability Report 2024. Aeris Resources Limited. https://aerisresources.com.au/wp-content/uploads/2024/10/Aeris-Sustainability-2024-v1.pdf.	Scope 1 GHG emissions	Input flows (I)	I from technosphere (tech) - materials/fuels	tCO2-e	9260	1.34203
Aeris Resources Limited. 2024b. Sustainability Report 2024. Aeris Resources Limited. https://aerisresources.com.au/wp-content/uploads/2024/10/Aeris-Sustainability-2024-v1.pdf.	Copper concentrate production	Product flows (P)	Reference product (of unit operation)	t	6900	1
S&P.2024	Gold production	Product flows (P)	Co-/By-product	oz	Not Disclosed	Not Disclosed

## Sheet: PR4_LosPelambres_CL_Antofagasta
Reference	Flow (As reported by the authors)	Type of flow	Classification of flows	Unit (As reported)	Total annual amount (Raw data as reported)	Inputs and Outputs Intensity (/tonne Cu concentrate)		Note: "Undefined system model": in this table, all values are reported without any allocation
Antofagasta plc. 2020. Sustainability Report 2020. Antofagasta plc. https://www.antofagasta.co.uk/media/4177/antofagasta_sustainability-report_2020.pdf.	Scope 1 direct emissions	Output flows (O)	O to env - air	tCO₂e	257801	0.71691
Antofagasta plc. 2020. Sustainability Report 2020. Antofagasta plc. https://www.antofagasta.co.uk/media/4177/antofagasta_sustainability-report_2020.pdf.	Copper Concentrate production	Product flows (P)	Reference product (of unit operation)	tonnes	359600	1
S&P.2020	Mo production	Product flows (P)	Co-/By-product	tonnes	Not Disclosed	Not Disclosed
S&P.2020	Gold production	Product flows (P)	Co-/By-product	oz	Not Disclosed	Not Disclosed
S&P.2020	Silver production	Product flows (P)	Co-/By-product	oz	Not Disclosed	Not Disclosed

## Sheet: PR5_Centinela_CL_Antofagasta
Reference	Flow (As reported by the authors)	Type of flow	Classification of flows	Unit (As reported)	Total annual amount (Raw data as reported)	Inputs and Outputs Intensity (/tonne Cu concentrate)		Note: "Undefined system model": in this table, all values are reported without any allocation
Antofagasta plc. 2020. Sustainability Report 2020. Antofagasta plc. https://www.antofagasta.co.uk/media/4177/antofagasta_sustainability-report_2020.pdf.	Scope 1 direct emissions	Output flows (O)	O to env - air	tCO₂e	492496	3.20844
Antofagasta plc. 2020. Annual Report and Financial Statements 2020. Antofagasta plc. https://prod.antofagasta.co.uk/media/4098/antofagasta_2020_annual_report.pdf	Copper in concentrate production	Product flows (P)	Reference product (of unit operation)	tonnes	153500	1
Antofagasta plc. 2020. Annual Report and Financial Statements 2020. Antofagasta plc. https://prod.antofagasta.co.uk/media/4098/antofagasta_2020_annual_report.pdf	Copper cathode production	Product flows (P)	Reference product (of unit operation)	tonnes	93300	0.607818
Antofagasta plc. 2020. Annual Report and Financial Statements 2020. Antofagasta plc. https://prod.antofagasta.co.uk/media/4098/antofagasta_2020_annual_report.pdf	Molybdenum production	Product flows (P)	Co-/By-product	tonnes	1700	0.0182208
Antofagasta plc. 2020. Annual Report and Financial Statements 2020. Antofagasta plc. https://prod.antofagasta.co.uk/media/4098/antofagasta_2020_annual_report.pdf	Gold production	Product flows (P)	Co-/By-product	oz	143700	0.936156

## Sheet: PR6_Antucoya_CL_Antofagasta
Reference	Flow (As reported by the authors)	Type of flow	Classification of flows	Unit (As reported)	Total annual amount (Raw data as reported)	Inputs and Outputs Intensity (/tonne Cu cathode)		Note: "Undefined system model": in this table, all values are reported without any allocation
Antofagasta plc. 2020. Sustainability Report 2020. Antofagasta plc. https://www.antofagasta.co.uk/media/4177/antofagasta_sustainability-report_2020.pdf.	Scope 1 direct emissions	Output flows (O)	O to env - air	tCO₂e	152577	1.92405
Antofagasta plc. 2020. Sustainability Report 2020. Antofagasta plc. https://www.antofagasta.co.uk/media/4177/antofagasta_sustainability-report_2020.pdf.	Copper production	Product flows (P)	Reference product (of unit operation)	tonnes	79300	1

## Sheet: PR7_Zaldivar_CL_Antofagasta
Reference	Flow (As reported by the authors)	Type of flow	Classification of flows	Unit (As reported)	Total annual amount (Raw data as reported)	Inputs and Outputs Intensity (/tonne Cu cathode)		Note: "Undefined system model": in this table, all values are reported without any allocation
Antofagasta plc. 2020. Sustainability Report 2020. Antofagasta plc. https://www.antofagasta.co.uk/media/4177/antofagasta_sustainability-report_2020.pdf.	Scope 1 direct emissions	Output flows (O)	O to env - air	tCO₂e	152340	3.16058
Antofagasta plc. 2020. Sustainability Report 2020. Antofagasta plc. https://www.antofagasta.co.uk/media/4177/antofagasta_sustainability-report_2020.pdf.	Copper cathode production	Product flows (P)	Reference product (of unit operation)	tonnes	48200	1

[truncated: 33 more sheets: PP8_Riotinto_ES_Atalaya Mining, PR9_PintoValley_US_Capstone, PR10_Cozamin_CL_Capstone, PR11_MantosBlancos_CL_Capstone , PR12_Mantoverde_MX_Capstone, PR13_Kounrad_KZ_CentralAsiaMeta, PR14_Sasa_MK_CentralAsiaMetals, PR15_Jiama_CN_ChinaGoldIR, PR16_Caraiba_BR_Erocopper, PR17_Tucuma_BR_Erocopper , PR18_Bagdad_US_Freeport, PR19_Chino_US_Freeport , PR20_Morenci_US_Freeport, PR21_Safford_US_Freeport , PR22_ Sierrita_US_Freeport, PR23_Tyrone_US_Freeport , PR24_CerroVerde_US_Freeport , PR25_El Abra_US_Freeport , PR26_Aktogay_KZ_KAZMinerals, PR27_Bozshakol_KZ_KazMinerals  …]
